# Supplementary material for: HELLS Is Negatively Regulated by Wild-Type P53 in Liver Cancer by a Mechanism Involving P21 and FOXM1
Source: MDPI journal article supplement (doi:10.3390/cancers14020459), 2022-01-17
Supplement: s1 [file s1]

Supplementary material:

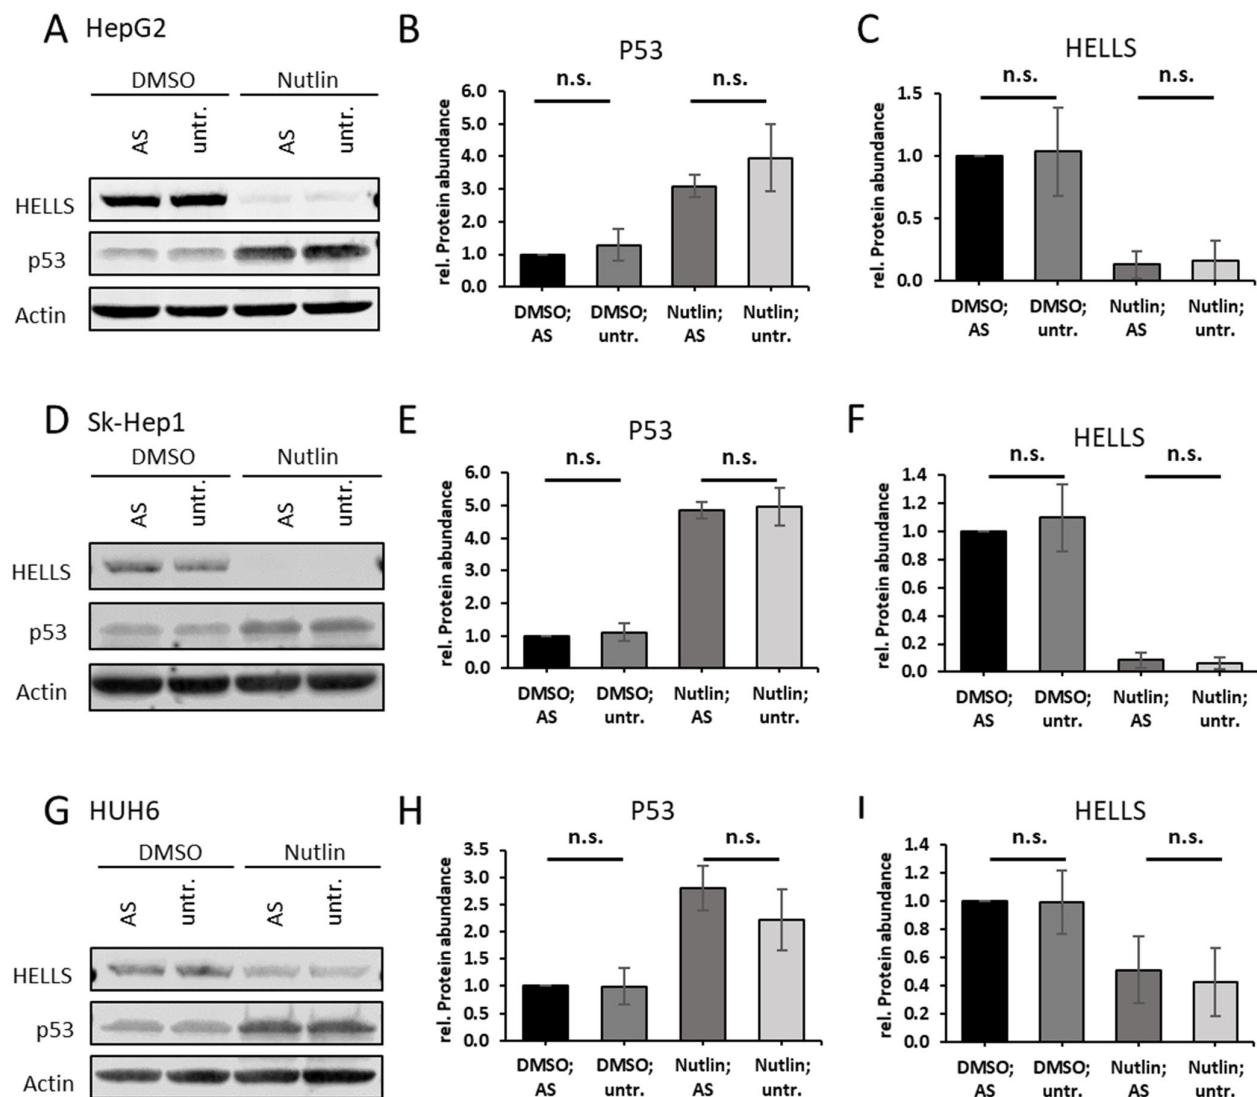

**Figure S1.** P53 and HELLS expression are not affected by control siRNA. (A) HepG2 cells were either transfected with control siRNA (AS, Allstars) or untransfected and incubated with DMSO or Nutlin-3a for 24h. Cell extracts were analyzed by immunoblotting with indicated antibodies. (B–C) Relative densitometric quantification of immunoblots derived from four independent experiments and normalized to the DMSO AS control as described in (A). (D–F) Sk-Hep1 cells were treated as described in (A) and (B). (G–I) HUH6 cells were treated as described in (A) and (B). n.s.=not significant (Student's t-test). Data are presented as mean  $\pm$  stdv.

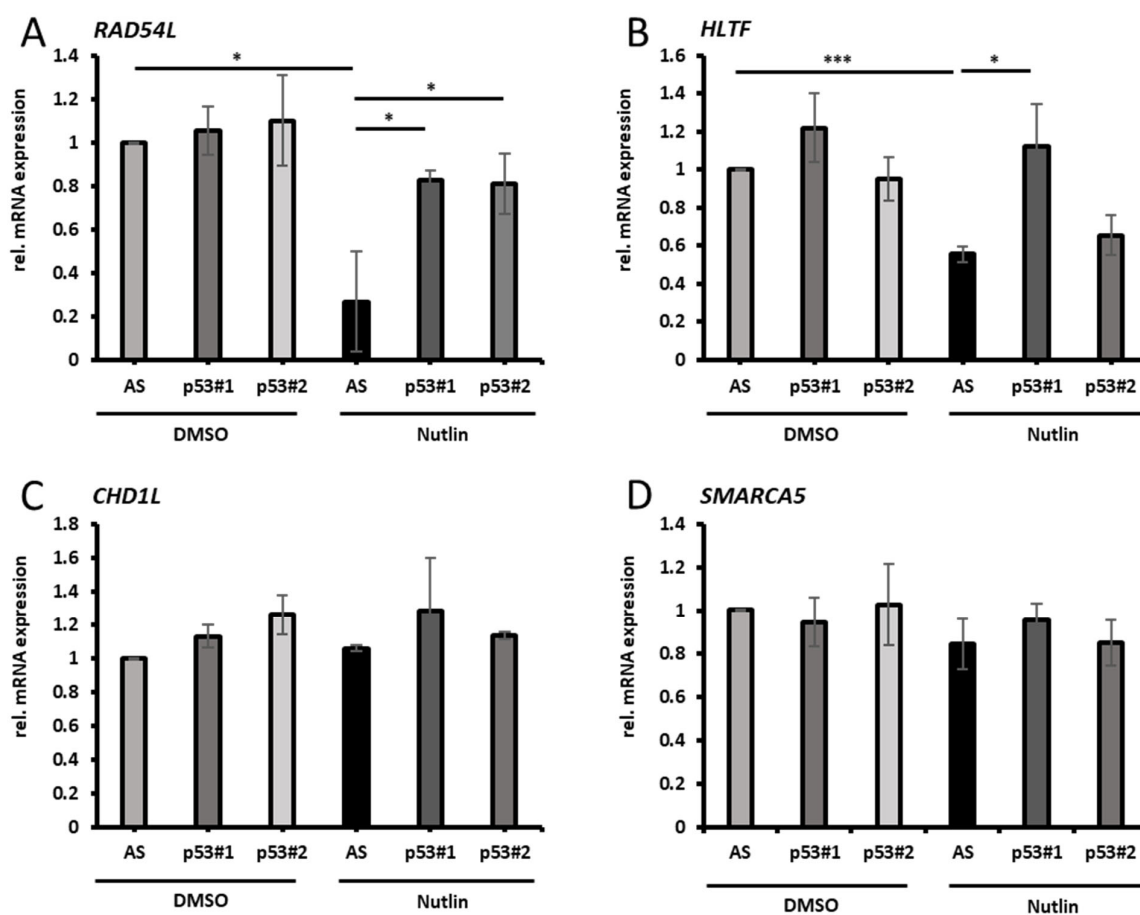

**Figure S2.** P53 dependent regulation of selected Snf2 family members. HepG2 cells were transfected with either control siRNA (AS) or two different P53 siRNAs (P53#1 and #2) and treated with DMSO or Nutlin-3a for 24h. Relative transcript levels of *RAD54L* (A), *HLTf* (B), *CHD1L* (C) and *SMARCA5* (D) derived from three biological replicates were measured by qRT-PCR. Significant comparisons are marked. \* $p < 0.05$ , \*\*\* $p < 0.001$  (Student's t-test). Data are presented as mean  $\pm$  stdv.

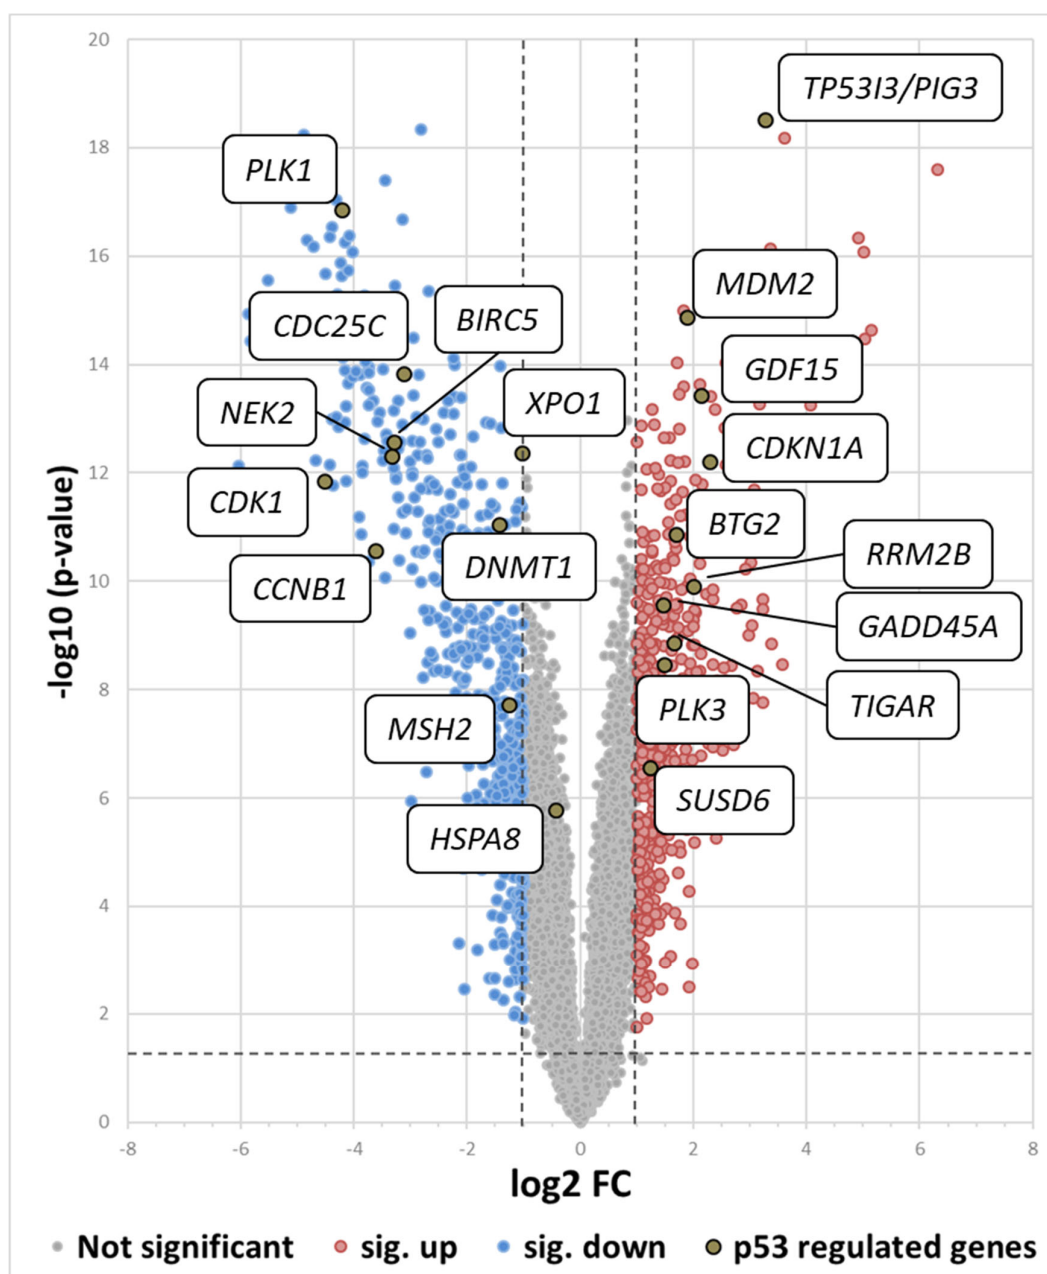

**Figure S3.** Expression of bona fide P53 target genes upon Nutlin-3a treatment in HepG2. Volcano plot showing 9129 transcripts identified in HepG2 cells by Affymetrix microarray. 530 transcripts were significantly up- (colored in red) and 571 transcripts were significantly down-regulated (colored in blue) after 24h Nutlin-3a treatment. (Horizontal dotted line  $p = 0.05$ ; vertical dotted lines  $\log_2$  fold-change 1.0 or  $-1.0$ ). mRNA levels of previously reported P53 target genes are highlighted in olive colour.

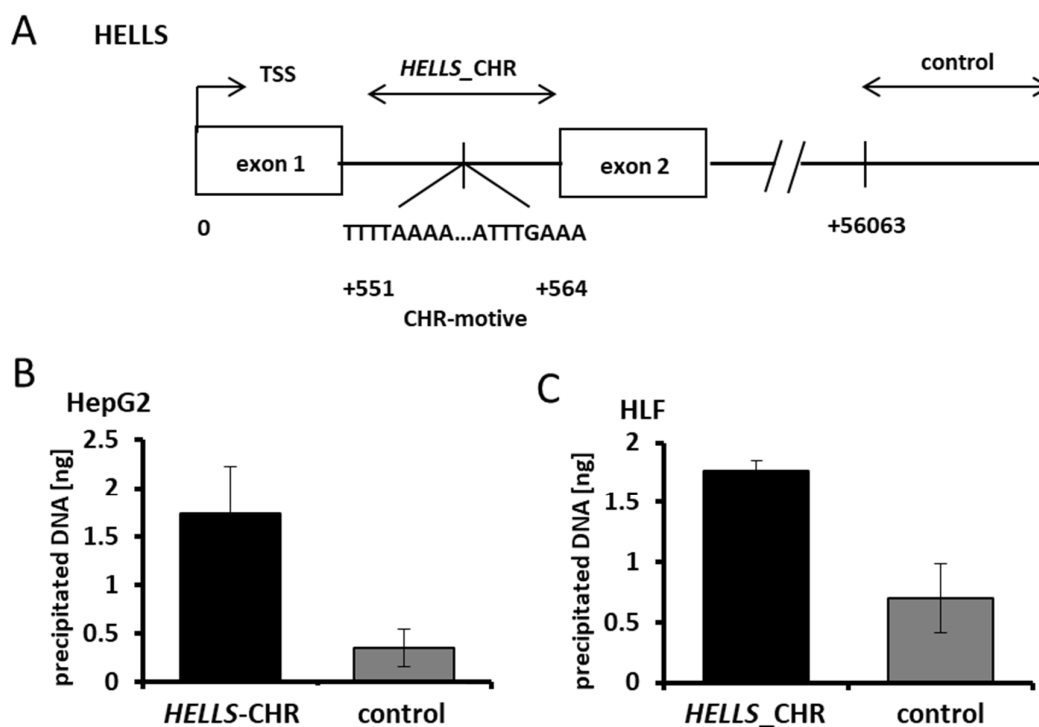

**Figure S4.** FOXM1 binds directly to a region in the first intron of the *HELLS* gene. (A) Schematic depiction of a non-canonical FOXM1 binding site between exon 1 and 2 containing two CHR motives as described by Chen et al. [31] Primer pair *HELLS\_CHR* was used to determine FOXM1 binding, a primer pair against 3'UTR serves as control. (B) Bar diagram shows amount of DNA precipitated by FOXM1 IP in HepG2 (B) and HLF (C) cells. FOXM1 chromatin immunoprecipitation (ChIP)-qPCR and data analysis have been performed as previously described by Weiler et al. [28]. All experiments have been performed in duplicates.

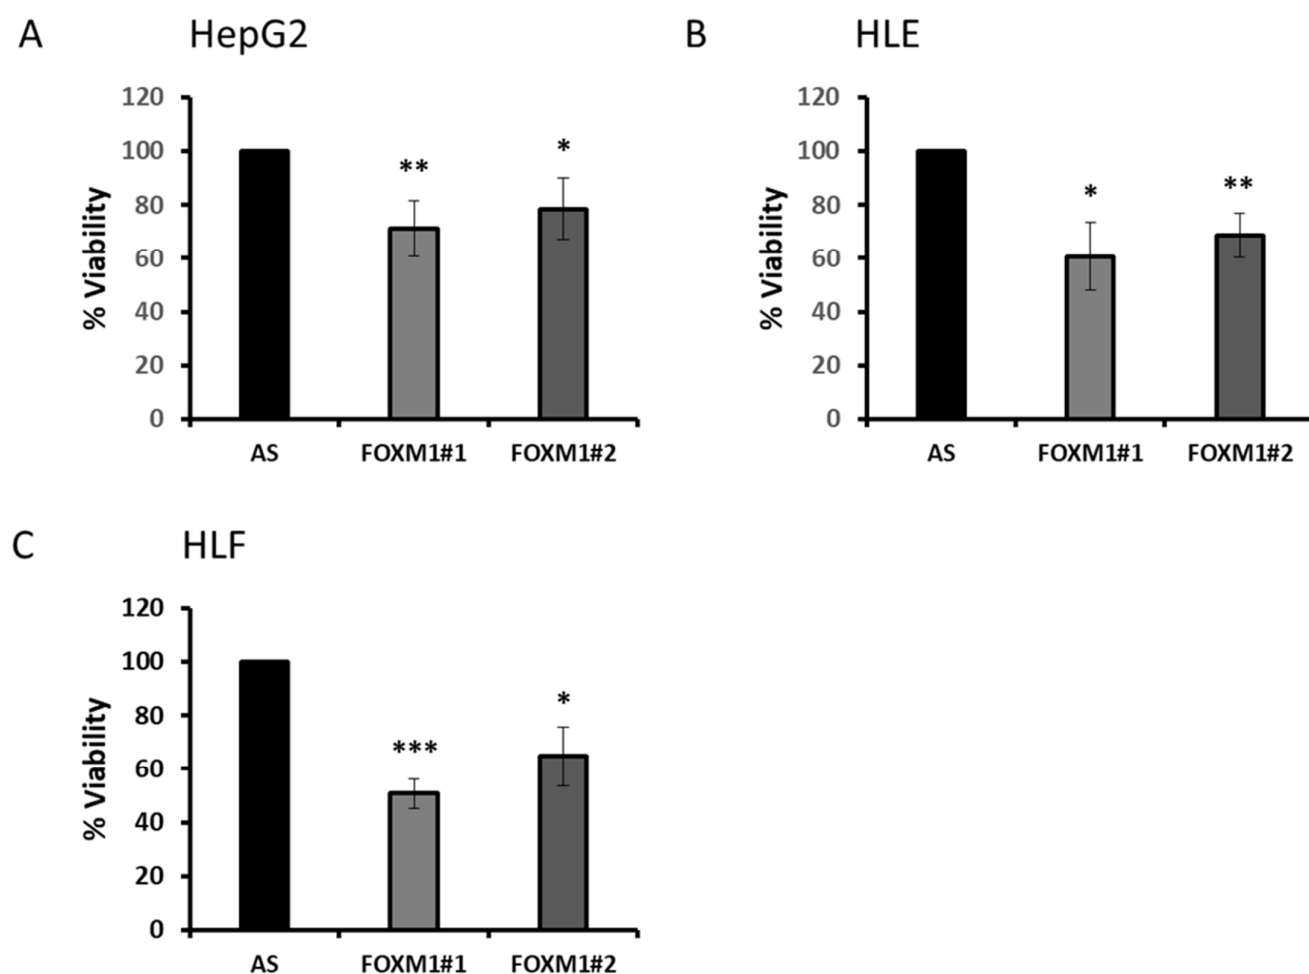

**Figure S5.** FOXM1 knockdown reduces viability. (A) HepG2 cells were transfected with either control siRNA (AS, Allstars) or two different FOXM1 siRNAs (FOXM1#1 and FOXM1#2). Cell viability was measured by MTT assays 4 days upon FOXM1 knockdown (B) HLE cells were treated as described in (A). (C) HLF cells were treated as described in (A) \* $p < 0.05$ , \*\* $p < 0.01$ , \*\*\* $p < 0.001$  (Student's t-test). Data are presented as mean  $\pm$  stdv.

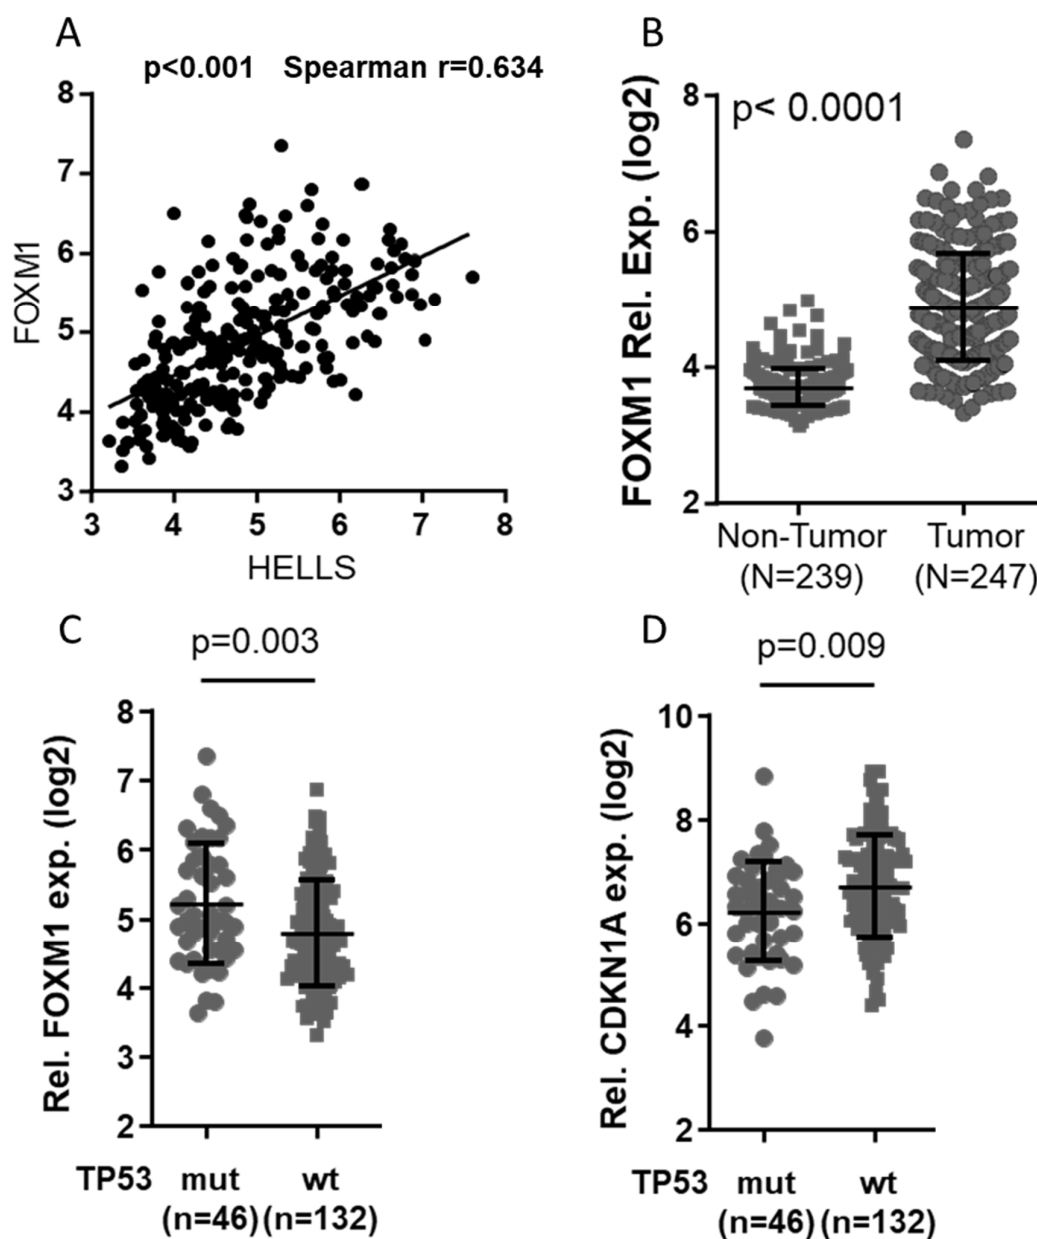

**Figure S6.** *HELLs*, *FOXM1* and *CDKN1A* expression levels in human HCC. (A) Correlation between *HELLs* and *FOXM1* expression in human HCC. (B) *FOXM1* expression in Hepatocellular carcinoma (HCC, Tumor) and matching non-tumorous tissue. (C) *FOXM1* expression in HCC harboring either wildtype (wt) or mutated (mut) *TP53*. (D) *CDKN1A* expression in HCC harboring either wildtype (wt) or mutated (mut) *TP53*. Analysis of the data set has been performed as previously published by Roessler et al. [30]. Statistical significance has been determined using the Mann-Whitney test.  $p$ -values  $\leq 0.05$  have been considered significant.

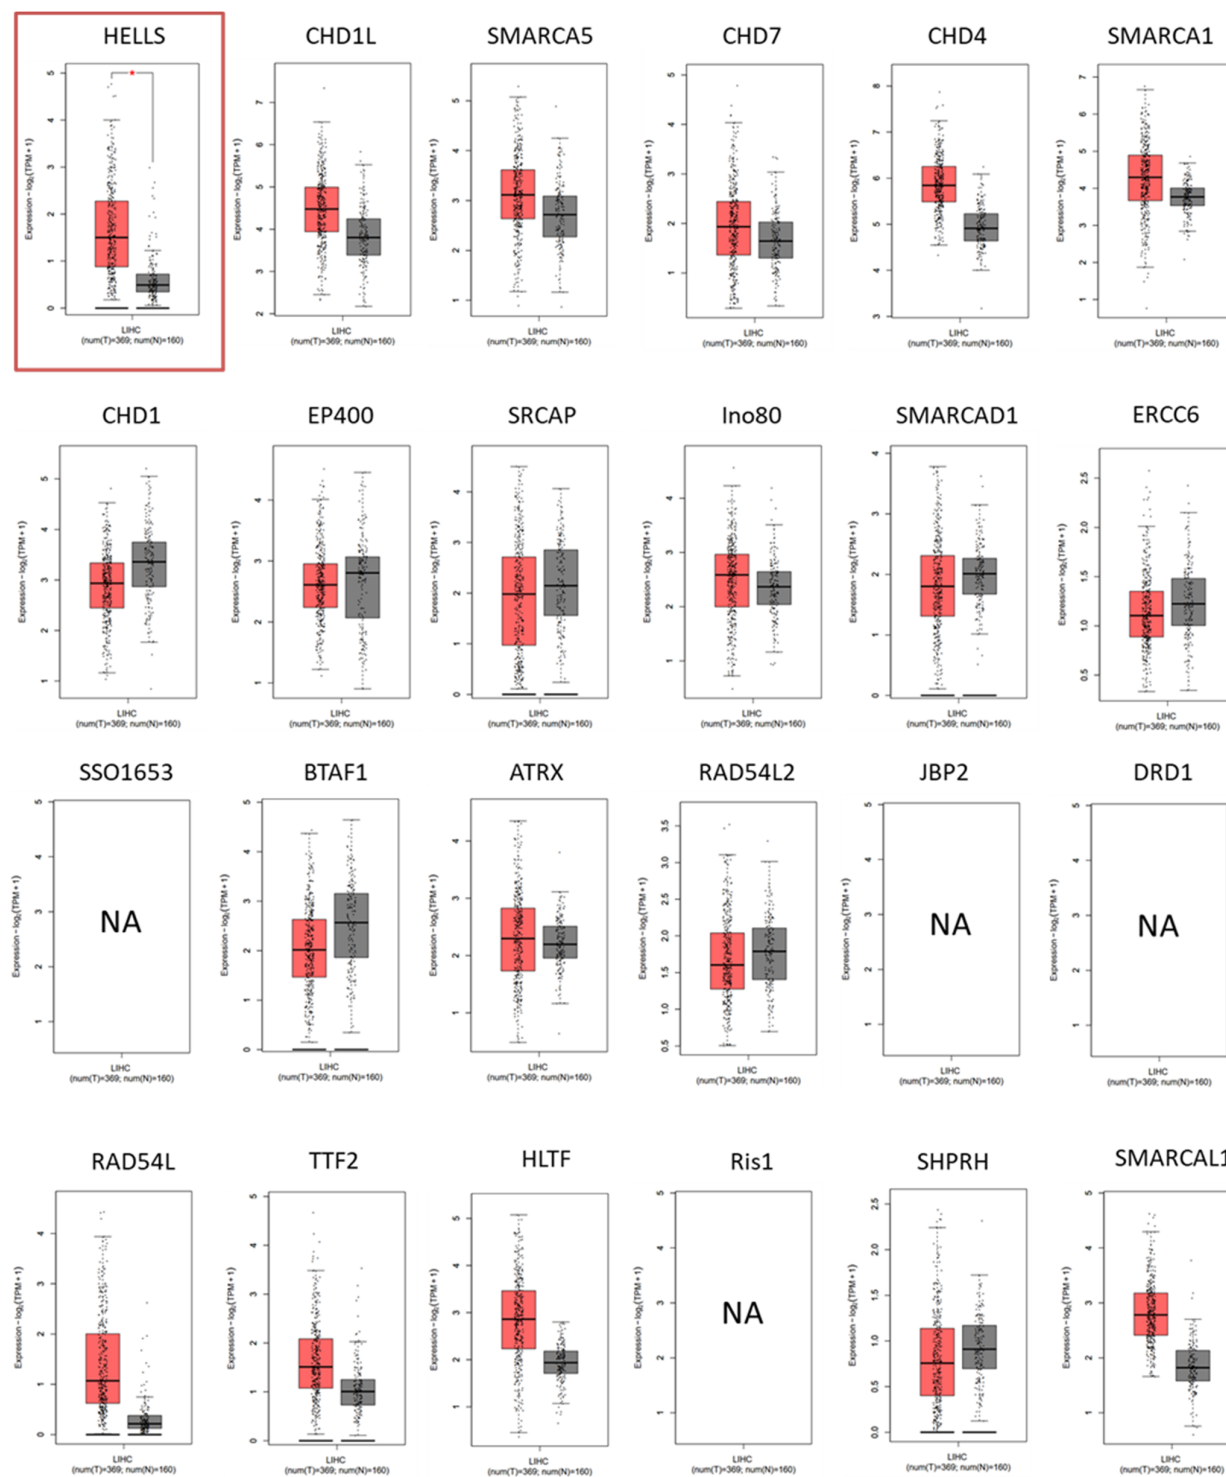

**Figure S7.** Expression of SNF2 family members in HCC. Comparative expression analysis of SNF2 family members (Flaus et al. [18]) in the TCGA HCC (LIHC) cohort using GEPIA2 [29]. Red boxes represent the expression in tumors (T=369), grey boxes represent non-tumorous tissue (NT=160). Statistically significant (log2 FC cutoff: 1.0; q-value cutoff: 0.01) comparisons are indicated by a red asterisk and frame. NA indicates that this SNF2 family member either has no homologue in humans or that there is no corresponding data in the TCGA data set.

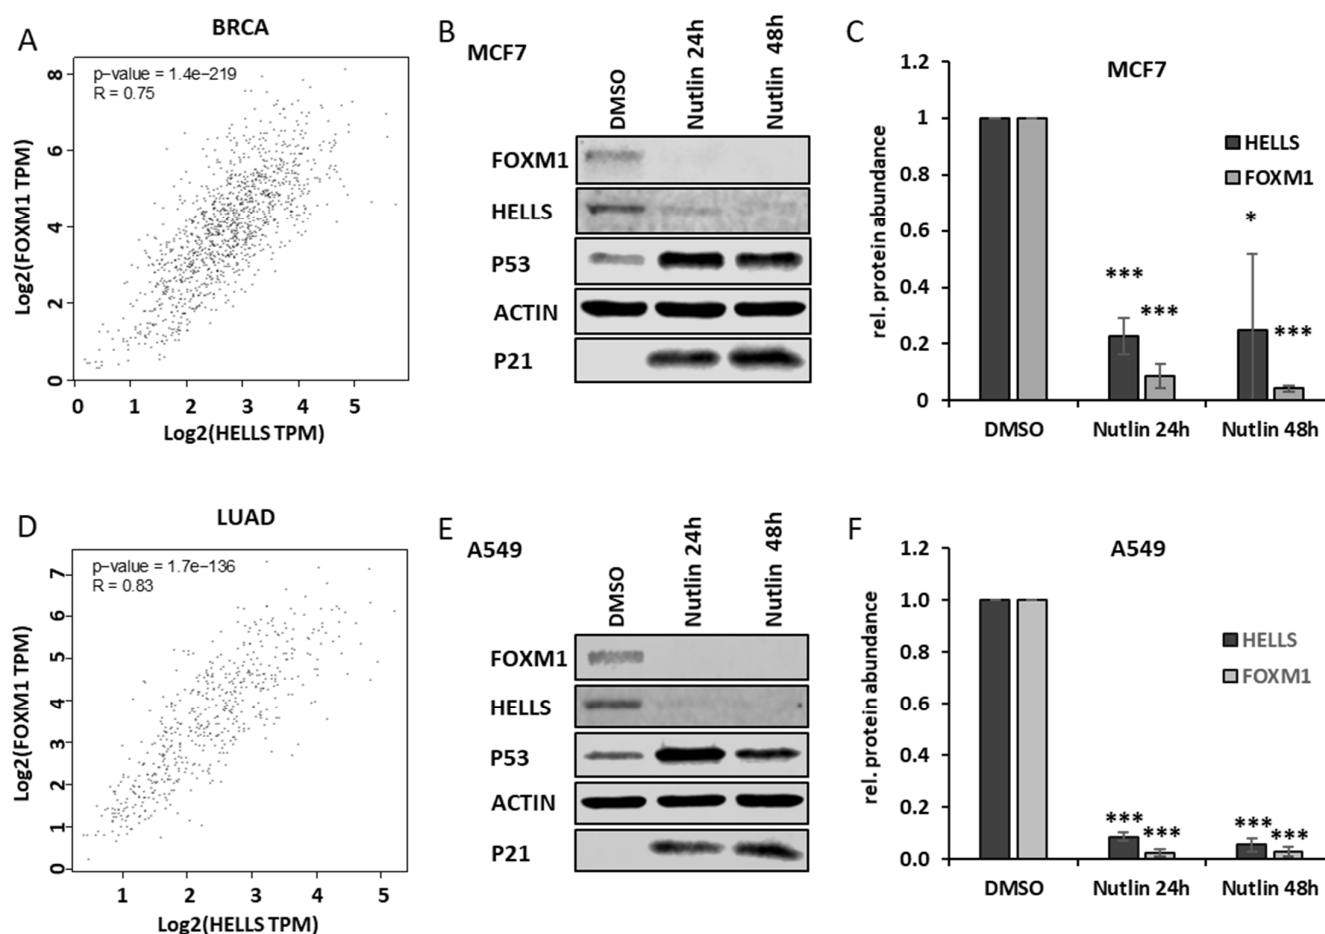

**Figure S8.** HELLs and FOXM1 expression in human breast cancer and human lung adenocarcinoma. (A) Correlation between *HELLs* and *FOXM1* expression in human breast cancer (BRCA) based on a TCGA data set. (B) MCF7 cells were treated with DMSO or Nutlin-3a for 24h or 48h. Cell extracts were analyzed by immunoblotting with indicated antibodies. (C) Relative densitometric quantification of immunoblots derived from four independent experiments and normalized to the DMSO control as described in (B). (D) Correlation between *HELLs* and *FOXM1* expression in human lung adenocarcinoma (LUAD) based on a TCGA data set. (E) A549 cells were treated with DMSO or Nutlin-3a for 24h or 48h. Cell extracts were analyzed by immunoblotting with indicated antibodies. (F) Relative densitometric quantification of immunoblots derived from four independent experiments and normalized to the DMSO control as described in (E). \* $p < 0.05$ , \*\* $p < 0.01$ , \*\*\* $p < 0.001$  (Student's t-test). Data are presented as mean  $\pm$  stdv.

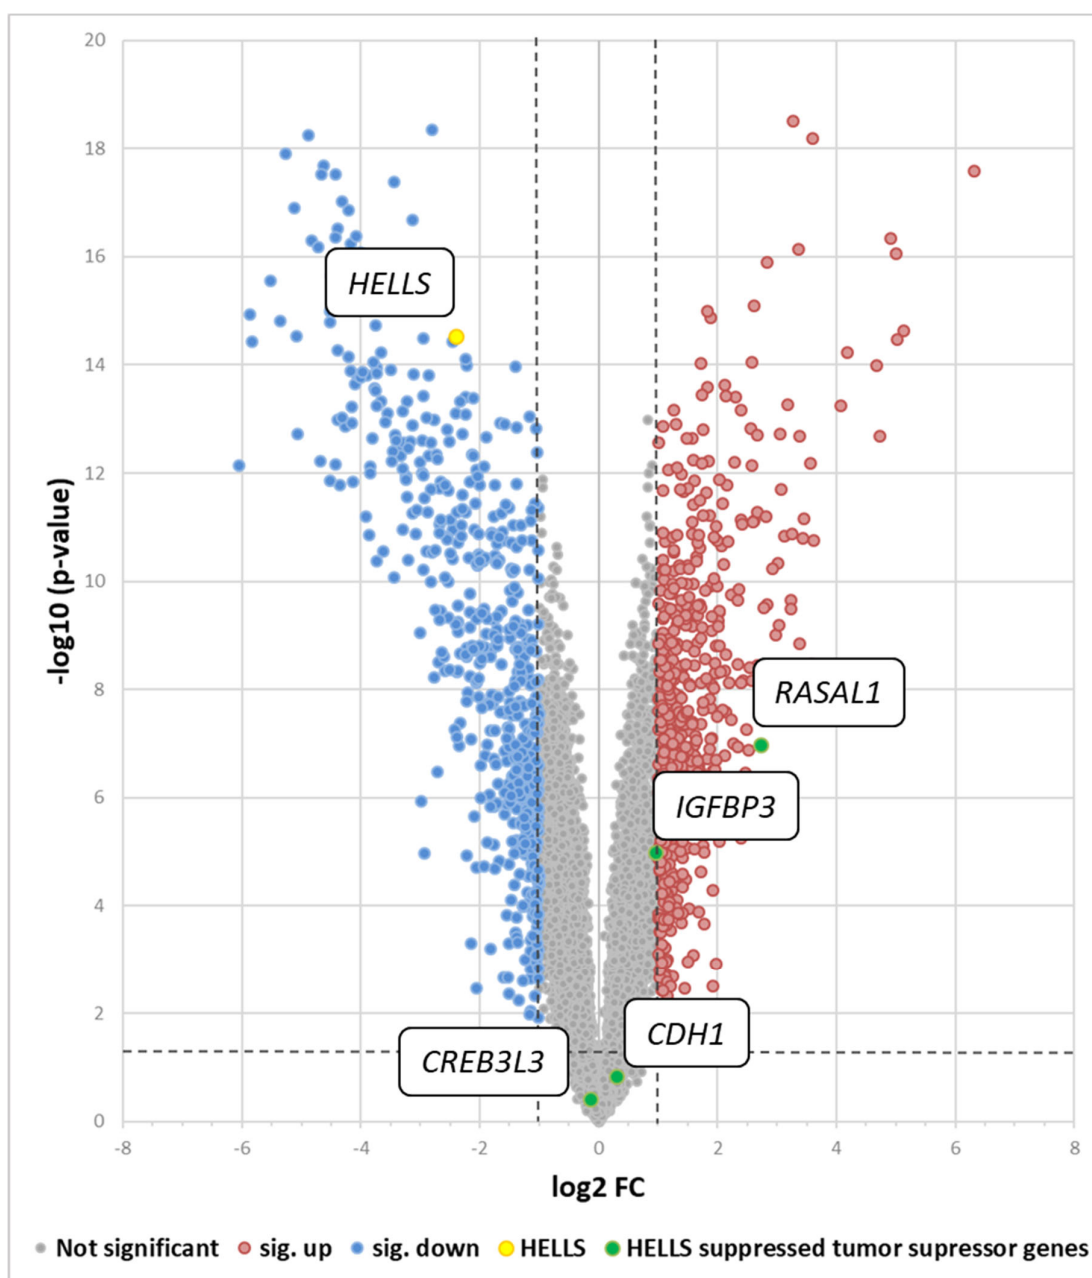

**Figure S9.** Expression of previously described HELLS-repressed tumor suppressor genes upon Nutlin-3a treatment in HepG2. Volcano plot showing 9129 transcripts identified in HepG2 cells by Affymetrix microarray. 530 transcripts were significantly up- (colored in red) and 571 transcripts were significantly down-regulated (colored in blue) after 24h Nutlin-3a treatment. (Horizontal dotted line  $p = 0.05$ ; vertical dotted lines  $\log_2$  fold-change 1.0 or -1.0). mRNA levels of tumor suppressor genes as discussed by Law et al. [19] are highlighted in green.

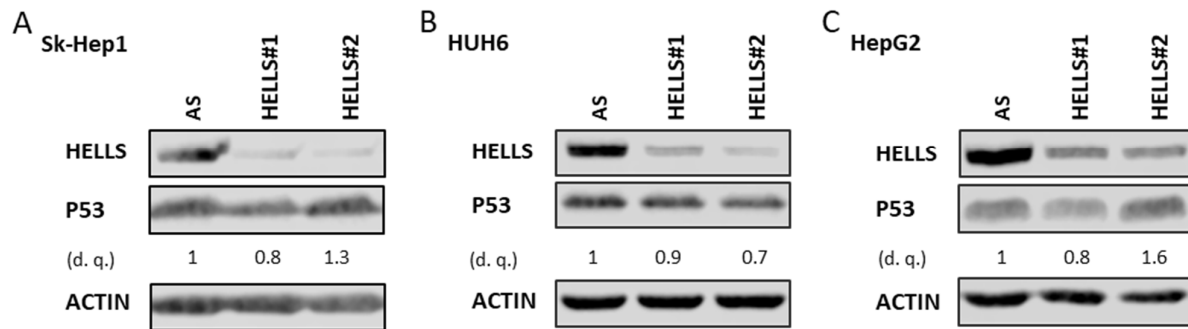

**Figure S10.** Basal levels of P53 protein are not strikingly and consistently affected by HELLS depletion. (A) Sk-Hep1 cells were transfected with either control siRNA (AS) or two different HELLS siRNAs (HELLS#1 and #2). Cell extracts were analyzed by immunoblotting with indicated antibodies. Densitometric quantification (d. q.) of P53 normalized to control siRNA. (B) HUH6 cells as described in (A). (C) HepG2 cells as described in (A).

**Table S1.** The 50 strongest up- and downregulated genes after Nutlin-treatment of HepG2 cells.

| GeneSymbol          | GeneName                                                            | log2 FC | Adj. p-value |
|---------------------|---------------------------------------------------------------------|---------|--------------|
| <i>ABCA12</i>       | ATP binding cassette subfamily A member 12                          | 6.31    | 5.11E-14     |
| <i>SIGLEC14</i>     | sialic acid binding Ig like lectin 14                               | 5.14    | 5.81E-12     |
| <i>LCN15</i>        | lipocalin 15                                                        | 5.02    | 7.36E-12     |
| <i>TYRP1</i>        | tyrosinase related protein 1                                        | 5.01    | 4.28E-13     |
| <i>NBEAP1</i>       | neurobeachin pseudogene 1                                           | 4.91    | 2.75E-13     |
| <i>LOC102723373</i> | uncharacterized LOC102723373                                        | 4.72    | 1.80E-10     |
| <i>LCE1F</i>        | late cornified envelope 1F                                          | 4.67    | 1.87E-11     |
| <i>DSC3</i>         | desmocollin 3                                                       | 4.17    | 1.21E-11     |
| <i>PDE4C</i>        | phosphodiesterase 4C                                                | 4.07    | 6.89E-11     |
| <i>LINC02334</i>    | long intergenic non-protein coding RNA 2334                         | 3.62    | 6.38E-09     |
| <i>PLTP</i>         | phospholipid transfer protein                                       | 3.61    | 2.58E-14     |
| <i>LCE1C</i>        | late cornified envelope 1C                                          | 3.58    | 5.12E-07     |
| <i>LOC101927355</i> | uncharacterized LOC101927355                                        | 3.57    | 4.35E-10     |
| <i>IZUMO1R</i>      | IZUMO1 receptor, JUNO                                               | 3.45    | 2.94E-09     |
| <i>LOC105373116</i> | uncharacterized LOC105373116                                        | 3.43    | 5.95E-09     |
| <i>S1PR3</i>        | sphingosine-1-phosphate receptor 3                                  | 3.38    | 2.50E-07     |
| <i>DRAXIN</i>       | dorsal inhibitory axon guidance protein                             | 3.38    | 1.76E-10     |
| <i>CLCA2</i>        | chloride channel accessory 2                                        | 3.36    | 3.82E-13     |
| <i>TP53I3</i>       | tumor protein p53 inducible protein 3                               | 3.27    | 2.58E-14     |
| <i>DENND1C</i>      | DENN domain containing 1C                                           | 3.25    | 5.04E-09     |
| <i>OR52N4</i>       | olfactory receptor family 52 subfamily N member 4 (gene/pseudogene) | 3.24    | 1.95E-06     |
| <i>TMEM27</i>       | transmembrane protein 27                                            | 3.24    | 7.15E-08     |
| <i>LOC101928447</i> | uncharacterized LOC101928447                                        | 3.23    | 5.02E-08     |
| <i>HLA-DOA</i>      | major histocompatibility complex, class II, DO alpha                | 3.17    | 6.61E-11     |
| <i>CSTA</i>         | cystatin A                                                          | 3.14    | 6.47E-07     |
| <i>FRMPD2</i>       | FERM and PDZ domain containing 2                                    | 3.13    | 5.46E-09     |
| <i>CABYR</i>        | calcium binding tyrosine phosphorylation regulated                  | 3.08    | 1.07E-09     |
| <i>ZNF385A</i>      | zinc finger protein 385A                                            | 3.06    | 1.70E-10     |
| <i>PSTPIP2</i>      | proline-serine-threonine phosphatase interacting protein 2          | 3.06    | 1.67E-06     |

|                     |                                                                      |      |          |
|---------------------|----------------------------------------------------------------------|------|----------|
| <i>TREM2</i>        | triggering receptor expressed on myeloid cells 2                     | 3.03 | 1.26E-07 |
| <i>IGFBP1</i>       | insulin like growth factor binding protein 1                         | 3.01 | 1.37E-08 |
| <i>TRIM22</i>       | tripartite motif containing 22                                       | 2.98 | 1.82E-07 |
| <i>C1QL3</i>        | complement C1q like 3                                                | 2.93 | 1.73E-08 |
| <i>CYGB</i>         | cytoglobin                                                           | 2.84 | 5.91E-13 |
| <i>LOC105375451</i> | uncharacterized LOC105375451                                         | 2.84 | 6.09E-08 |
| <i>PLEKHG1</i>      | pleckstrin homology and RhoGEF domain containing G1                  | 2.81 | 2.78E-09 |
| <i>CALHM1</i>       | calcium homeostasis modulator 1                                      | 2.78 | 6.87E-08 |
| <i>RASAL1</i>       | RAS protein activator like 1                                         | 2.72 | 8.26E-06 |
| <i>ANKRA2</i>       | ankyrin repeat family A member 2                                     | 2.68 | 1.73E-10 |
| <i>GPRC5B</i>       | G protein-coupled receptor class C group 5 member B                  | 2.67 | 5.23E-07 |
| <i>DPYSL4</i>       | dihydropyrimidinase like 4                                           | 2.66 | 2.41E-09 |
| <i>GLS2</i>         | glutaminase 2                                                        | 2.61 | 2.49E-12 |
| <i>LOC102723561</i> | uncharacterized LOC102723561                                         | 2.61 | 3.23E-09 |
| <i>RRAD</i>         | RRAD, Ras related glycolysis inhibitor and calcium channel regulator | 2.59 | 3.38E-09 |
| <i>AMOTL1</i>       | angiominin like 1                                                    | 2.58 | 4.67E-10 |
| <i>TNNI2</i>        | troponin I2, fast skeletal type                                      | 2.58 | 8.93E-07 |
| <i>LINC02086</i>    | long intergenic non-protein coding RNA 2086                          | 2.57 | 1.71E-11 |
| <i>CEL</i>          | carboxyl ester lipase                                                | 2.56 | 1.38E-10 |
| <i>GAL3ST4</i>      | galactose-3-O-sulfotransferase 4                                     | 2.54 | 5.69E-07 |
| <i>LINC01173</i>    | long intergenic non-protein coding RNA 1173                          | 2.52 | 9.94E-06 |

|                  |                                                         |       |          |
|------------------|---------------------------------------------------------|-------|----------|
| <i>NUF2</i>      | NUF2, NDC80 kinetochore complex component               | -3.87 | 5.18E-09 |
| <i>HMGB2</i>     | high mobility group box 2                               | -3.90 | 2.55E-11 |
| <i>KIF15</i>     | kinesin family member 15                                | -3.91 | 2.80E-09 |
| <i>TICRR</i>     | TOPBP1 interacting checkpoint and replication regulator | -3.97 | 2.37E-11 |
| <i>BRIP1</i>     | BRCA1 interacting protein C-terminal helicase 1         | -4.01 | 2.71E-11 |
| <i>NUSAP1</i>    | nucleolar and spindle associated protein 1              | -4.01 | 4.28E-13 |
| <i>MAD2L1</i>    | mitotic arrest deficient 2 like 1                       | -4.06 | 2.55E-11 |
| <i>KIF14</i>     | kinesin family member 14                                | -4.08 | 2.72E-13 |
| <i>PLK4</i>      | polo like kinase 4                                      | -4.11 | 3.46E-11 |
| <i>SKA3</i>      | spindle and kinetochore associated complex subunit 3    | -4.11 | 8.33E-13 |
| <i>PRC1</i>      | protein regulator of cytokinesis 1                      | -4.14 | 8.15E-10 |
| <i>CEP55</i>     | centrosomal protein 55                                  | -4.15 | 7.04E-11 |
| <i>HIST1H2AB</i> | histone cluster 1 H2A family member b                   | -4.15 | 1.15E-10 |
| <i>KIF18A</i>    | kinesin family member 18A                               | -4.16 | 3.17E-13 |
| <i>CDC20</i>     | cell division cycle 20                                  | -4.16 | 2.22E-11 |
| <i>GIN5</i>      | GIN5 complex subunit 2                                  | -4.20 | 1.44E-11 |
| <i>KIF2C</i>     | kinesin family member 2C                                | -4.21 | 9.77E-13 |
| <i>PLK1</i>      | polo like kinase 1                                      | -4.21 | 1.22E-13 |
| <i>SPAG5</i>     | sperm associated antigen 5                              | -4.23 | 6.04E-13 |
| <i>SGO1</i>      | shugoshin 1                                             | -4.27 | 1.31E-10 |
| <i>RRM2</i>      | ribonucleotide reductase regulatory subunit M2          | -4.29 | 1.81E-12 |
| <i>CCNB2</i>     | cyclin B2                                               | -4.31 | 9.73E-11 |
| <i>SHCBP1</i>    | SHC binding and spindle associated 1                    | -4.32 | 9.15E-14 |
| <b>FOXM1</b>     | forkhead box M1                                         | -4.32 | 2.69E-12 |
| <i>CENPF</i>     | centromere protein F                                    | -4.36 | 9.26E-10 |

|                  |                                                                     |       |          |
|------------------|---------------------------------------------------------------------|-------|----------|
| <i>KIF11</i>     | kinesin family member 11                                            | -4.38 | 1.06E-10 |
| <i>CENPE</i>     | centromere protein E                                                | -4.39 | 2.06E-13 |
| <i>MCM10</i>     | minichromosome maintenance 10 replication initiation factor         | -4.39 | 1.12E-11 |
| <i>KIF23</i>     | kinesin family member 23                                            | -4.42 | 4.63E-10 |
| <i>TTK</i>       | TTK protein kinase                                                  | -4.43 | 2.72E-13 |
| <i>HMMR</i>      | hyaluronan mediated motility receptor                               | -4.43 | 5.11E-14 |
| <i>ASPM</i>      | abnormal spindle microtubule assembly                               | -4.50 | 9.12E-13 |
| <i>KIF20A</i>    | kinesin family member 20A                                           | -4.51 | 4.09E-12 |
| <i>CDK1</i>      | cyclin dependent kinase 1                                           | -4.52 | 8.08E-10 |
| <i>MKI67</i>     | marker of proliferation Ki-67                                       | -4.52 | 2.89E-12 |
| <i>ESCO2</i>     | establishment of sister chromatid cohesion<br>N-acetyltransferase 2 | -4.63 | 4.88E-14 |
| <i>PBK</i>       | PDZ binding kinase                                                  | -4.67 | 5.11E-14 |
| <i>NCAPH</i>     | non-SMC condensin I complex subunit H                               | -4.68 | 4.02E-10 |
| <i>CDC6</i>      | cell division cycle 6                                               | -4.72 | 3.69E-13 |
| <i>DLGAP5</i>    | DLG associated protein 5                                            | -4.82 | 3.00E-13 |
| <i>ARHGAP11A</i> | Rho GTPase activating protein 11A                                   | -4.89 | 2.58E-14 |
| <i>DTL</i>       | denticleless E3 ubiquitin protein ligase homolog                    | -5.06 | 1.66E-10 |
| <i>HIST1H4D</i>  | histone cluster 1 H4 family member d                                | -5.09 | 6.80E-12 |
| <i>TOP2A</i>     | DNA topoisomerase II alpha                                          | -5.11 | 1.19E-13 |
| <i>CCNA2</i>     | cyclin A2                                                           | -5.27 | 3.66E-14 |
| <i>BUB1</i>      | BUB1 mitotic checkpoint serine/threonine kinase                     | -5.36 | 3.93E-12 |
| <i>NCAPG</i>     | non-SMC condensin I complex subunit G                               | -5.52 | 1.10E-12 |
| <i>FAM111B</i>   | family with sequence similarity 111 member B                        | -5.82 | 8.07E-12 |
| <i>HIST1H3B</i>  | histone cluster 1 H3 family member b                                | -5.87 | 3.20E-12 |
| <i>HIST1H2BM</i> | histone cluster 1 H2B family member m                               | -6.04 | 4.78E-10 |
